# Supplementary material
Source: publisher site journal article supplement (https://www.dovepress.com/get_supplementary_file.php?f=437123.docx)
Supplement: Supplementary file 1 [file get_supplementary_file.php]

**Supplementary material**

**Table 1** Municipalities constituting the geographical background for the Copenhagen General Practice Laboratory (CGPL).

| **2000-2006** | **2007-2015** |
| --- | --- |
| Albertslund | Albertslund |
| Ballerup | Ballerup |
| Brøndby | Brøndby |
| Dragør | Dragør |
| Gentofte | Gentofte |
| Gladsaxe | Gladsaxe |
| Glostrup | Glostrup |
| Herlev | Herlev |
| Hvidovre | Hvidovre |
| Høje-Taastrup | Høje-Taastrup |
| Ishøj | Ishøj |
| København | København |
| Ledøje-Smørum | *-* |
| Lyngby-Taarbæk | Lyngby-Taarbæk |
| Rødovre | Rødovre |
| Søllerød | *-* |
| Tårnby | Tårnby |
| Vallensbæk | Vallensbæk |
| Værløse |  |

Table 2 Distribution of background population by gender, age, number of requisitions and tests per person, and use of general practitioners

| **Year** | **2000** | **2001** | **2002** | **2003** | **2004** | **2005** | **2006** | **2007** |
| --- | --- | --- | --- | --- | --- | --- | --- | --- |
| Total population | 1,067,526 | 1,079,020 | 1,087,390 | 1,093,094 | 1,097,197 | 1,100,504 | 1,102,811 | 1,047,536 |
| Agea median (IQR) | 37.0 (23.0, 55.0) | 37.0 (23.0, 55.0) | 37.0 (23.0, 55.0) | 37.0 (23.0, 55.0) | 37.0 (22.0, 55.0) | 37.0 (22.0, 55.0) | 37.0 (22.0, 55.0) | 37.0 (22.0, 55.0) |
| Gendera Female % | 51.5 | 51.4 | 51.4 | 51.4 | 51.3 | 51.3 | 51.3 | 51.2 |
| Number of requisitions per person | 0.3 | 0.4 | 0.5 | 0.5 | 0.5 | 0.5 | 0.6 | 0.7 |
| Number of tests per person | 3.6 | 5.4 | 5.7 | 7.2 | 7.9 | 8.4 | 9.4 | 11.0 |
| No GPb % | 18.0 | 17.1 | 17.0 | 17.1 | 16.6 | 16.5 | 16.0 | 16.2 |
| GP - test % | 65.9 | 62.4 | 61.6 | 60.7 | 60.1 | 59.5 | 58.0 | 56.9 |
| GP+ test % | 16.1 | 20.5 | 21.4 | 22.2 | 23.3 | 24.0 | 26.0 | 26.8 |

Table 2 continued

| **Year** | **2008** | **2009** | **2010** | **2011** | **2012** | **2013** | **2014** | **2015** |
| --- | --- | --- | --- | --- | --- | --- | --- | --- |
| Total population | 1,056,868 | 1,070,711 | 1,085,771 | 1,102,325 | 1,116,961 | 1,133,705 | 1,151,545 | 1,172,140 |
| Agea median (IQR) | 37.0 (22.0, 55.0) | 36.0 (22.0, 55.0) | 36.0 (22.0, 54.0) | 36.0 (21.0, 54.0) | 36.0 (21.0, 54.0) | 36.0 (21.0, 54.0) | 36.0 (21.0, 54.0) | 36.0 (22.0, 54.0) |
| Gendera Female % | 51.1 | 51.1 | 51.0 | 51.0 | 51.0 | 50.9 | 50.9 | 50.8 |
| Number of requisitions per person | 0.7 | 0.7 | 0.7 | 0.7 | 0.7 | 0.7 | 0.7 | 0.7 |
| Number of tests per person | 11.7 | 11.8 | 11.5 | 11.8 | 12.5 | 13.2 | 13.5 | 13.7 |
| No GPb % | 16.1 | 15.7 | 16.6 | 16.0 | 16.5 | 16.8 | 16.7 | 16.7 |
| GP - test % | 55.5 | 55.7 | 55.8 | 56.1 | 54.7 | 54.3 | 54.4 | 54.2 |
| GP+ test % | 28.4 | 28.6 | 27.6 | 27.9 | 28.8 | 28.9 | 28.9 | 29.1 |

(GP) and tests in CopLab displayed by calendar year.a age and gender from the population registry 1st Jan each year.b combined variable using CopLab data and data from the The national Health Service Register, categorized in the following groups ‘no GP‘ comprises persons with no contact to GP, ‘GP – test’ comprises persons with contacts with GP but no CopLab tests, ‘GP+tests’ comprises individuals with GP contact and CopLab tests. In this overview only CopLab requisitions from a GP were included.

**Table 3** Distribution of selected clinical biochemistry tests (sorted by test group)

| Tests by test group | **Name** | **IUPAC-code** | **Available for years** | **Total Number of tests** | **Number of normal tests** | **Tests below reference (%)** | **Tests above reference (%)** |
| --- | --- | --- | --- | --- | --- | --- | --- |
| Allergy | Inhalation antigen antibody | NPU27315 | 2010-2015 | 131,995 | 75,767 |  | 56,228 (42.60) |
| Food allergen antibody (f1;2;3;4;13;14) (IgE) | NPU19617 | 2000-2015 | 52,317 | 45,498 |  | 6,819 (13.03) |
| Mold fungus antibody (m1;2;3;6) (IgE) | NPU19626 | 2000-2015 | 48,774 | 43,415 |  | 5,359 (10.99) |
| Nut antibody (f13;17;18;20;36) (IgE) | NPU26712 | 2000-2015 | 26,169 | 20,756 |  | 5,413 (20.68) |
| Endocrinology | Thyrotropin | NPU03577 | 2000-2015 | 3,613,042 | 3,279,777 | 116,633 (3.23) | 216,632 (6.00) |
| Calcium | NPU01443 | 2000-2015 | 1,380,542 | 1,292,998 | 47,601 (3.45) | 39,943 (2.89) |
| Thyroxine, free | NPU03579 | 2000-2015 | 699,028 | 637,160 | 20,896 (2.99) | 40,972 (5.86) |
| Triiodothyronine, total | NPU03624 | 2000-2015 | 284,607 | 257,356 | 4,584 (1.61) | 22,667 (7.96) |
| Parathyroid hormone | NPU03028 | 2004-2015 | 262,562 | 203,028 | 4,266 (1.62) | 55,268 (21.05) |
| Haematology | Haemoglobina | NPU02319 | 2000-2015 | 5,070,431 | 4,569,709 | 481,420 (9.49) | 19,302 (0.38) |
| Neutrophilocytesb | NPU02902 | 2000-2015 | 2,773,693 | 2,466,402 | 67,486 (2.43) | 239,805 (8.65) |
| Cobalamin | NPU01700 | 2000-2015 | 940,455 | 912,846 | 27,609 (2.94) |  |
| Ferritin | NPU19763 | 2000-2015 | 672,288 | 552,431 | 63,996 (9.52) | 55,861 (8.31) |
|  | Transferrin saturation | NPU04191 |  | 221,404 | 172,765 | 43,954 (19.85) | 4,685 (2.12) |
| Coagulation | Coagulation, tissue factor-induced (INR) | NPU01685 | 2000-2015 | 999,710 | 552,392 | 280,782 (28.09) | 166,536 (16.66) |
| Immunology and inflammation | C-reactive protein | NPU19748 | 2000-2015 | 3,259,070 | 2,667,926 |  | 591,144 (18.14) |
| Transglutaminase antibody (IgA) | NPU14566 | 2006-2015 | 64,670 | 63,751 |  | 919 (1.42) |
| Deamidated gliadin peptide antibody (IgG) | NPU28161 | 2013-2015 | 1,542 | 1,479 |  | 63 (4.09) |
| Infection | Rubellavirus antibody (IgG) | NPU12410 | 2000-2015 | 119,288 | 110,167 | 9,121 (7.65) |  |
| Epstein-Barr virus nucelar antibody (IgG) | NPU12471 | 2000-2015 | 115,047 | 90,634 |  | 24,413 (21.22) |
| Epstein-Barr virus capsid antibody (IgM) | NPU14079 | 2000-2015 | 73,539 | 59,010 |  | 14,529 (19.76) |
| Metabolism | Cholesterol+ester | NPU01566 | 2000-2015 | 3,390,067 | 2,886,608 | 419,562 (12.38) | 83,897 (2.47) |
| Cholesterol+ester, in HDL | NPU01567 | 2000-2015 | 2,950,600 | 2,666,427 | 107,139 (3.63) | 177,034 (6.00) |
| Triglyceride, fasting patient | NPU03620 | 2000-2015 | 2,183,806 | 1,838,327 | 28,440 (1.30) | 317,039 (14.52) |
| Cholesterol+ester, in LDL, fasting patient | NPU10171 | 2000-2015 | 2,048,372 | 1,712,470 | 280,912 (13.71) | 54,990 (2.68) |
| Glucose, fasting patient | NPU02195 | 2000-2015 | 1,557,950 | 1,067,705 | 16,895 (1.08) | 473,350 (30.38) |
|  | Haemoglobin A1c (IFCC) | NPU27300 | 2010-2015d | 1,219,425 | 838,468 | 48,496 (3.98) | 332,461 (27.26) |
| Organ markers | Creatininium | NPU18016 | 2000-2015 | 4,967,841 | 4,421,729 | 118,331 (2.38) | 427,781 (8.61) |
| Alanine transaminase | NPU19651 | 2000-2015 | 4,409,901 | 3,992,999 | 60,097 (1.36) | 356,805 (8.09) |
| Alkaline phosphatase | NPU19655 | 2000-2015 | 3,497,442 | 3,093,600 | 42,127 (1.20) | 361,715 (10.34) |
| Brain natriuretic peptide | NPU17181 | 2006-2015 | 101,493 | 79,711 |  | 21,782 (21.46) |
| Trace elements and vitamins | Vitamin D | NPU10267 | 2004-2015 | 1,708,356 | 1,091,231 | 610,271 (35.72) | 6,854 (0.40) |
| Tumor markers | Prostata specific antigen | NPU08669 | 2000-2015 | 434,910 | 353,454 |  | 81,456 (18.73) |
| Urine tests | Urine Albumin/Creatininium ratio | NPU19661 | 2000-2015 | 482,911 | 378,230 |  | 104,681 (21.68) |
| Urine dip stick test, Erythrocytese | NPU20197 | 2000-2015 | 257,345 | 204,145 |  | 53,200 (20.67) |
| Fluid and electrolyte balance | Sodium ion | NPU03429 | 2000-2015 | 3,990,427 | 3,684,023 | 249,996 (6.26) | 56,408 (1.41) |
| Potassium ion | NPU03230 | 2000-2015 | 3,912,170 | 3,380,897 | 69,256 (1.77) | 462,017 (11.81) |
| a The number of haemoglobin tests represents the number of Complete Blood Counts (Haemoglobin, Leukocytes, Thrombocytes, Erythrocyte mean corpuscular  volume (MCV) and Erythrocyte volumes; relative distribution width (RDW).  b The number of Neutrophilocyte tests represents the number of white blood cell  differential counts.  c Calculated as: Iron;P /(2xTransferrin;P). d Year 2000-2010, NPU29296 Haemoglobin A1c (NGSP): N = 762835. eThe number of Urine dip  stick test, Erythrocytes represents the number of Urine dip stick test Acetoacetate, Protein, Glucose, Bacterium, nitrite producing and Leukocytes. | | | | | | | | |
